# Supplementary material
Source: publisher figshare collection journal article supplement (https://sage.figshare.com/ndownloader/files/15026072)
Supplement: Supplementary file 1 [file 15026072]

**Appendix Table A1.** Summary of The Histological Assessment<sup>a</sup>

| Time point<br>Treatment | Cellularity <sup>b</sup><br>% | Vascularity <sup>c</sup><br>bv/ low PF | Collagen fiber orientation <sup>d</sup><br>% | Total score <sup>e</sup> |
|-------------------------|-------------------------------|----------------------------------------|----------------------------------------------|--------------------------|
| 2 weeks                 |                               |                                        |                                              |                          |
| Control (n = 6)         | 556 ± 60.0                    | 32.3 ± 8.7                             | 30.0 ± 7.2                                   | 3.8 ± 0.4                |
| FGF-2 (n = 6)           | 590 ± 57.1                    | 30.6 ± 11.8                            | 28.9 ± 7.6                                   | 3.7 ± 0.5                |
| <i>P</i> value          | .230                          | .872                                   | .749                                         | .631                     |
| 6 weeks                 |                               |                                        |                                              |                          |
| Control (n = 6)         | 379 ± 92.4                    | 16.8 ± 3.8                             | 50.7 ± 5.2                                   | 6.2 ± 1.2                |
| FGF-2 (n = 6)           | 283 ± 27.5                    | 18.9 ± 3.4                             | 66.0 ± 6.0 ]*                                | 6.8 ± 0.8                |
| <i>P</i> value          | .078                          | .200                                   | .007                                         | .262                     |
| 12 weeks                |                               |                                        |                                              |                          |
| Control (n = 6)         | 308 ± 47.6 ]*                 | 12.4 ± 3.2 ]*                          | 54.3 ± 6.3 ]*                                | 7.2 ± 0.8 ]*             |
| FGF-2 (n = 6)           | 249 ± 19.2 ]*                 | 7.6 ± 2.5 ]*                           | 68.7 ± 6.8 ]*                                | 9.3 ± 1.0 ]*             |
| <i>P</i> value          | .025                          | .010                                   | .025                                         | .004                     |

<sup>a</sup>All values are the mean ± standard deviation.

<sup>b</sup>Number of cells per region of interest from each section; percentages represent relative values compared to the values from normal tendon-to-bone sections (756 ± 40.0 cells/mm<sup>2</sup>, n = 6), which were set to 100%.

<sup>c</sup>Number of blood vessels per low PF (100-fold magnification) from each section; bv, blood vessel; PF, power field.

<sup>d</sup>Gray scale per region of interest from each section as measured using Image J; percentages represent relative values compared to the values from normal tendon-to-bone sections (192.2 ± 17.5 gray scale, n = 6), which were set to 100%.

<sup>e</sup>Scores represent a total score of three parameters including cellularity, vascularity and collagen fiber orientation. A perfect score in this scoring system is 12 points.

\*Significantly different between groups at the same time point (*P* < 0.05).

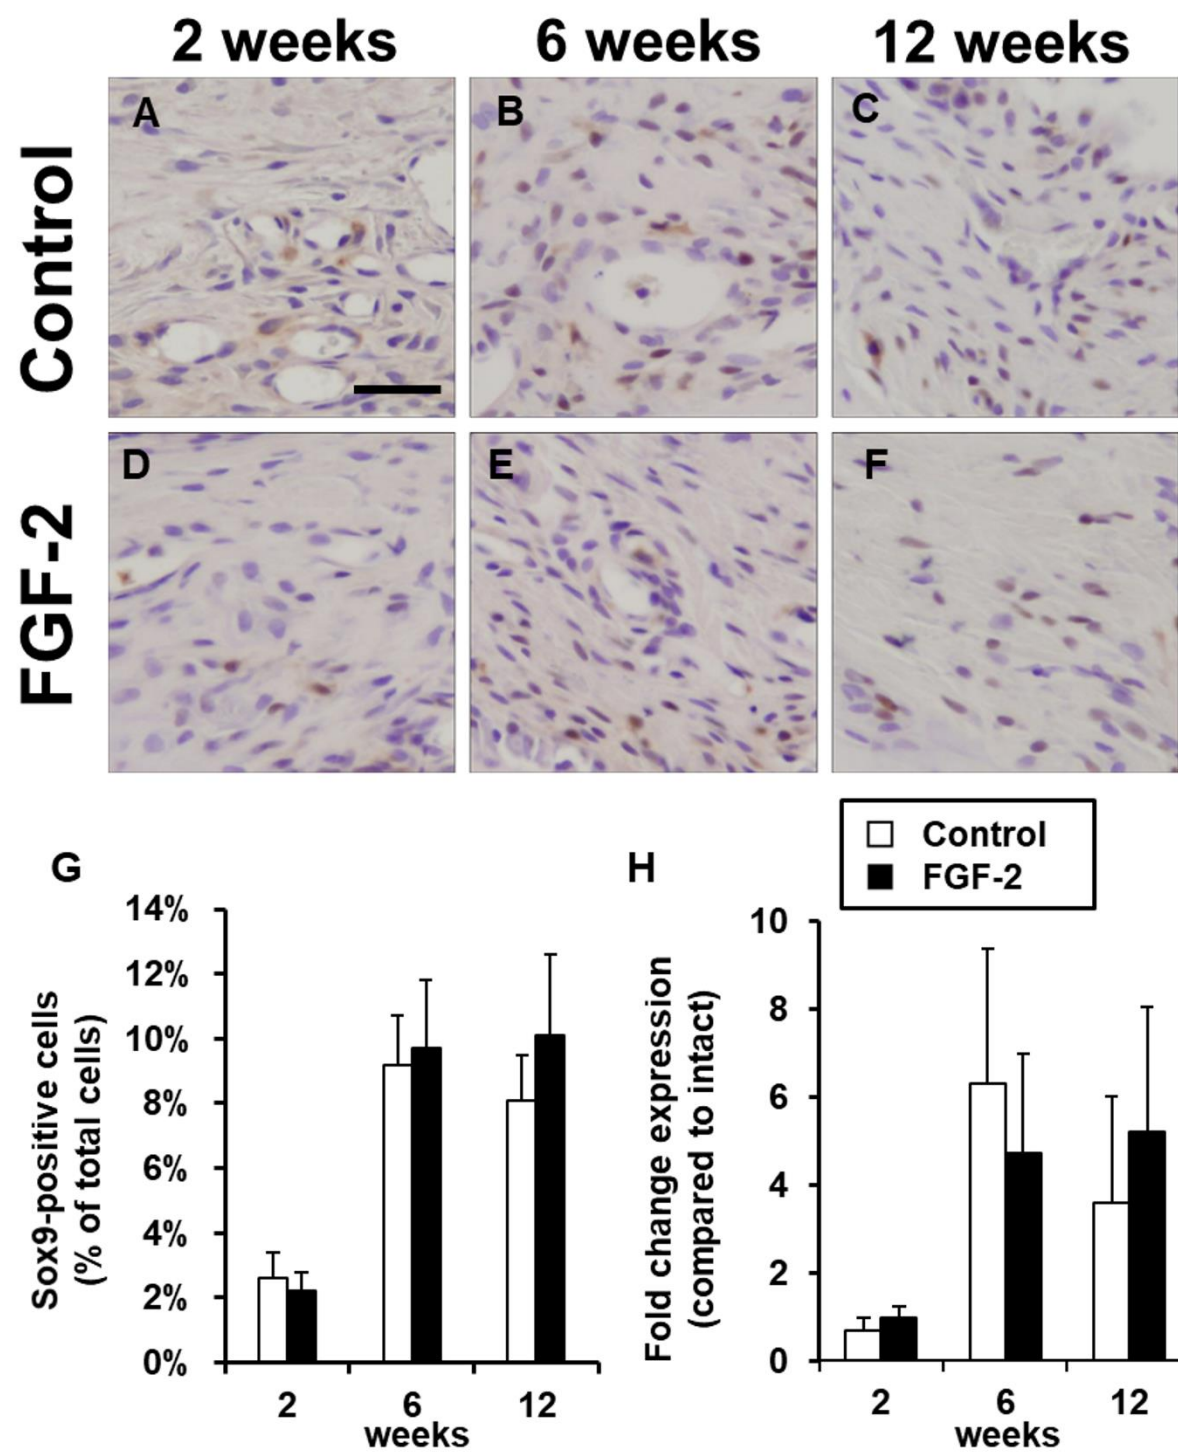

**Appendix Figure A1.** Immunostaining for Sox9 at 2, 6, and 12 weeks postoperation (A–C: control; D–F: FGF-2). Percentage of Sox9-positive cells in the region of interest at the insertion site (G). The sections were counterstained with hematoxylin. Bars, 50  $\mu$ m. Columns represent mean  $\pm$  one standard deviation.
